# Supplementary material for: Abundance of Amino Acid Transporters and mTOR Pathway Components in the Gastrointestinal Tract of Lactating Holstein Cows
Source: MDPI journal article supplement (doi:10.3390/ani13071189), 2023-03-29

## Supplemental Methods

### RNA extraction

Approximately 50 mg of tissue was homogenized with 1 mL Qiazol (Qiagen, Hilden, Germany). Samples were centrifuged for 10 min at  $12,000 \times g$  at  $4^{\circ}\text{C}$ , and the supernatant was collected and held at room temperature for 5 min. Two-hundred  $\mu\text{L}$  chloroform was added, shaken by hand, incubated at room temperature for 3 min, and centrifuged for 15 min at  $12,000 \times g$  at  $4^{\circ}\text{C}$ . The supernatant was collected and mixed with 750  $\mu\text{L}$  ethanol. The samples were centrifuged at 12,000 rpm for 15 sec in the miRNeasy mini spin column to collect the pellet. Three-hundred fifty  $\mu\text{L}$  RWT buffer was used to wash the sample, followed by centrifugation at 12,000 rpm for 15 s. Eighty  $\mu\text{L}$  DNase I digestion mix (DNase I: RDD buffer = 1:7) (Qiagen, Hilden, Germany) was added to the spin column to degrade DNA. Three-hundred fifty  $\mu\text{L}$  RWT buffer was used to wash the sample, followed by centrifugation at 12,000 rpm for 15 s. Five-hundred  $\mu\text{L}$  RPE buffer was used to wash the sample twice for 15 seconds, followed by centrifugation at 12,000 rpm for 2 min. The miRNeasy mini spin column was placed in a new 2 mL collection tube, and centrifuged at 15,000 rpm for 1 min. The miRNeasy mini spin column was transferred to a new 1.5 mL collection tube, and 50  $\mu\text{L}$  of RNase-free water was added directly on to mini spin column membrane. After incubating for 1 min, the column was centrifuged for 1 min at 12,000 rpm to elute RNA. Total RNA quantification was determined using a Nanodrop ND-1000 (NanoDrop Technologies, Rockland, DE). The RNA was diluted to 100 ng/ $\mu\text{L}$  with DNase/RNase-free water. The purity and integrity of extracted RNA were evaluated using an Agilent Bioanalyzer at the ROY J. CARVER Biotechnology Center, University of Illinois, Urbana-Champaign.

### qPCR

qPCR was performed in a MicroAmp Optical 384-Well Reaction Plate (Cat. #4309849, Applied Biosystems). Within each well, 4  $\mu\text{L}$  of diluted cDNA combined with 6  $\mu\text{L}$  of a mixture composed of 5  $\mu\text{L}$  1 $\times$ SYBR Green master mix (Cat. #4309155, Applied Biosystems), 0.4  $\mu\text{L}$  each of 10  $\mu\text{M}$  forward and reverse primers, and 0.2  $\mu\text{L}$  of DNase/RNase-free water were added. To test the relative expression level, three replicates and a 7-point standard curve plus the nontemplate control (NTC) were run for each sample. qPCR was conducted in QuantStudio 7 real-time PCR machine (Applied Biosystems) following the conditions: 2 min at  $50^{\circ}\text{C}$ , 10 min at  $95^{\circ}\text{C}$ , 40 cycles of 15 s at  $95^{\circ}\text{C}$  (denaturation), and 1 min at  $60^{\circ}\text{C}$  (annealing + extension). The presence of a single PCR product was verified by the dissociation protocol using incremental temperatures to  $95^{\circ}\text{C}$  for 15 s, then  $60^{\circ}\text{C}$  for 1 min. The threshold cycle ( $C_t$ ) and quantity data were analyzed and transformed using the standard curve with the QuantStudio Software (version v1.7.2, Applied Biosystems, CA). Quantity data were normalized by dividing the geometric mean of the three Internal Control Genes (ICG): UXT, GAPDH, and RPS9. Each gene was run in triplicate.

### Relative mRNA Abundance

The  $C_t$  value, slope, and  $R^2$  data were analyzed by QuantStudio Software (version v1.7.2, Applied Biosystems, CA). The efficiency of qPCR amplification for each gene was calculated using the standard curve method ( $\text{Efficiency} = 10^{(-1/\text{slope})}$ ). Relative mRNA abundance among measured genes was calculated by:  $1/(\text{Efficiency of tested gene} \times \text{Median of } \Delta C_t \text{ of tested gene in all samples})$ . The  $\Delta C_t$  of tested genes for each sample was calculated by:  $C_t$  value of tested

gene in each tested sample – geometric mean Ct of 3 ICG in each tested sample. The overall percentage of relative mRNA abundance (mRNA abundance%) was computed from the equation:  $100 \times \text{mRNA abundance of each gene} / \text{sum of mRNA abundance of all the genes investigated}$ .

## Supplemental table

**Supplemental Table 1.** GenBank accession number, sequence, and amplicon size of primers for *Bos taurus* used to analyze gene expression.

| Gene                 | Accession #                    | Primers (5'-3')                                  | bp  |
|----------------------|--------------------------------|--------------------------------------------------|-----|
| Amino acid transport |                                |                                                  |     |
| <i>SLC1A1</i>        | <a href="#">NM_174599.2</a>    | GGTGATTGTGCTGAGTGCTG<br>CTCCACAATGCCAGTCCCAA     | 133 |
| <i>SLC1A5</i>        | <a href="#">NM_174601.2</a>    | GGCTAGCAGCTGTTTACTCCT<br>AGTCTGGGGGCTAGAAGACG    | 129 |
| <i>SLC3A2</i>        | <a href="#">NM_001024488.2</a> | GAGCATTCCCTTGCTTGACAC<br>GCTCATGGTGCCTGAGTCG     | 175 |
| <i>SLC6A6</i>        | <a href="#">NM_174610.2</a>    | TCGCCAACCTGACGGTGTTA<br>GGCTTCAGGATGTCCTTGTGG    | 118 |
| <i>SLC7A5</i>        | <a href="#">NM_174613.2</a>    | CCGTACCCTCACTGGTGTTT<br>AGATGAACCTTGATGGGCCG     | 181 |
| <i>SLC7A8</i>        | <a href="#">NM_001192889.2</a> | GCACCGGAACAACACTGAAA<br>CAGAGCCGATGATGTTCCCTAC   | 143 |
| <i>SLC38A1</i>       | <a href="#">XM_010827702.2</a> | GGAAGGGCGGATACCACTTT<br>TGACACCCCTGTTATCTCAGC    | 168 |
| <i>SLC38A2</i>       | <a href="#">NM_001082424.1</a> | TGAAAAGCCATTATGCCGATGT<br>CCCACAATCGCATTGCTCAG   | 148 |
| <i>SLC38A7</i>       | <a href="#">NM_001100355.1</a> | CTTTGTCTTCCCAGGGCTGT<br>CCCAGTGTGACCAAGAGGAC     | 114 |
| <i>SLC38A11</i>      | <a href="#">NM_001031760.1</a> | TAGAGCTCAATGGCGTGCTC<br>AGCACCAATGGGAAGCATGA     | 134 |
| <i>SLC43A2</i>       | <a href="#">NM_001075546.1</a> | TACACCTCCATCTTCGGGGT<br>TTCTTCTCACCTGGGTTGGC     | 143 |
| mTOR pathway         |                                |                                                  |     |
| <i>AKT1</i>          | <a href="#">NM_173986.2</a>    | CTGCACAAGCGAGGTGAGTA<br>GAGAAGTTGTTGAGGGGCGA     | 134 |
| <i>MTOR</i>          | <a href="#">NM_001144096.3</a> | GGTTAACACCAAGCAGGTTTCAT<br>GTATGTGCGCACTGGACACCA | 134 |
| <i>RPS6KB1</i>       | <a href="#">NM_205816.1</a>    | ACAGCCTGCTTTTACTTGGC<br>AGGTGTGTGTGACTGTTCCG     | 178 |
| <i>EIF4EBP1</i>      | <a href="#">NM_001077893.2</a> | GGAGTGTGCGGAACCTCACCTG<br>AACTGTGACTCTTCACCGCC   | 162 |
| <i>EIF4EBP2</i>      | <a href="#">NM_001191149.1</a> | AAGCATGCAGTTGGGGATGA<br>AACGGGGATTGCTGGTACTG     | 158 |
| <i>EEF1A1</i>        | <a href="#">NM_174535.2</a>    | CCCTTCCTGGGGACAATGTG                             | 134 |

|             |                       |                         |     |
|-------------|-----------------------|-------------------------|-----|
|             |                       | AATAATCACCTGAGCTGTGAAGC |     |
| <i>IRS1</i> | <u>XM_003581871.4</u> | CTCAAGAGTGCCACCTCAA     | 187 |
|             |                       | AGGTCTTCATTCTGCTGTGAT   |     |

**Supplemental Table 2.** Median Ct, Median  $\Delta$ Ct Slope, coefficient of determination of the standard curve ( $R^2$ ), efficiency of amplification, relative mRNA abundance,  $1/E\Delta$ Ct and percentage of mRNA abundance.

| Gene     | Median Ct <sup>1</sup> | Median $\Delta$ Ct <sup>2</sup> | Slope <sup>3</sup> | ( $R^2$ ) <sup>4</sup> | Efficiency <sup>5</sup> | relative mRNA abundance <sup>6</sup> | mRNA abundance% <sup>7</sup> |
|----------|------------------------|---------------------------------|--------------------|------------------------|-------------------------|--------------------------------------|------------------------------|
| mTOR     | 24.88                  | 4.13                            | -3.44              | 0.99                   | 1.95                    | 0.06                                 | 0.41                         |
| Akt      | 22.92                  | 2.28                            | -3.27              | 1.00                   | 2.02                    | 0.20                                 | 1.31                         |
| RPS6KB1  | 25.09                  | 4.46                            | -3.59              | 0.96                   | 1.90                    | 0.06                                 | 0.37                         |
| EIF4BP1  | 25.24                  | 4.76                            | -3.51              | 0.96                   | 1.93                    | 0.04                                 | 0.29                         |
| EIF4EBP2 | 21.93                  | 1.28                            | -3.38              | 0.98                   | 1.97                    | 0.42                                 | 2.71                         |
| EEF1A1   | 16.84                  | -3.93                           | -3.46              | 0.99                   | 1.95                    | 13.73                                | 88.93                        |
| IRS1     | 26.39                  | 5.64                            | -3.04              | 0.98                   | 2.13                    | 0.01                                 | 0.09                         |
| SLC1A1   | 26.07                  | 6.13                            | -3.37              | 0.98                   | 1.98                    | 0.02                                 | 0.10                         |
| SLC1A5   | 24.10                  | 3.49                            | -3.65              | 0.98                   | 1.88                    | 0.11                                 | 0.72                         |
| SLC3A2   | 26.44                  | 5.62                            | -3.48              | 0.98                   | 1.94                    | 0.02                                 | 0.16                         |
| SLC6A6   | 28.41                  | 7.72                            | -3.66              | 0.98                   | 1.88                    | 0.01                                 | 0.05                         |
| SLC7A5   | 24.98                  | 4.26                            | -3.43              | 0.96                   | 1.96                    | 0.06                                 | 0.37                         |
| SLC7A8   | 27.15                  | 6.53                            | -3.37              | 0.97                   | 1.98                    | 0.01                                 | 0.07                         |
| SLC38A1  | 24.49                  | 3.73                            | -3.30              | 0.99                   | 2.01                    | 0.07                                 | 0.48                         |
| SLC38A2  | 21.45                  | 0.98                            | -3.37              | 1.00                   | 1.98                    | 0.51                                 | 3.32                         |
| SLC38A7  | 26.25                  | 5.52                            | -3.63              | 0.94                   | 1.88                    | 0.03                                 | 0.20                         |
| SLC38A11 | 27.93                  | 6.59                            | -3.48              | 0.99                   | 1.94                    | 0.01                                 | 0.08                         |
| SLC43A2  | 24.90                  | 4.23                            | -3.34              | 0.99                   | 1.99                    | 0.05                                 | 0.35                         |

<sup>1</sup> The median was calculated considering all samples.

<sup>2</sup> The median of  $\Delta$ Ct was calculated as [Ct gene – geometrical mean of Ct internal controls] for all samples.

<sup>3</sup> Slope of the standard curve.

<sup>4</sup>  $R^2$  stands for the coefficient of determination of the standard curve.

<sup>5</sup> Efficiency was calculated as  $[10^{(-1 / \text{Slope})}]$ .

<sup>6</sup> relative mRNA abundance =  $1 / \text{Efficiency Median } \Delta$ Ct

$$^7 1/\Delta Ct = 100 \times (\text{relative mRNA abundance} / \sum \text{relative mRNA abundance})$$

**Supplemental Figure 1.** Boxplot of taurocholic acid, glycocholic acid, and glycochenodeoxycholic acid concentrations in tissue harvested from rumen, duodenum, jejunum, and ileum from lactating Holstein cows (n = 8/group).

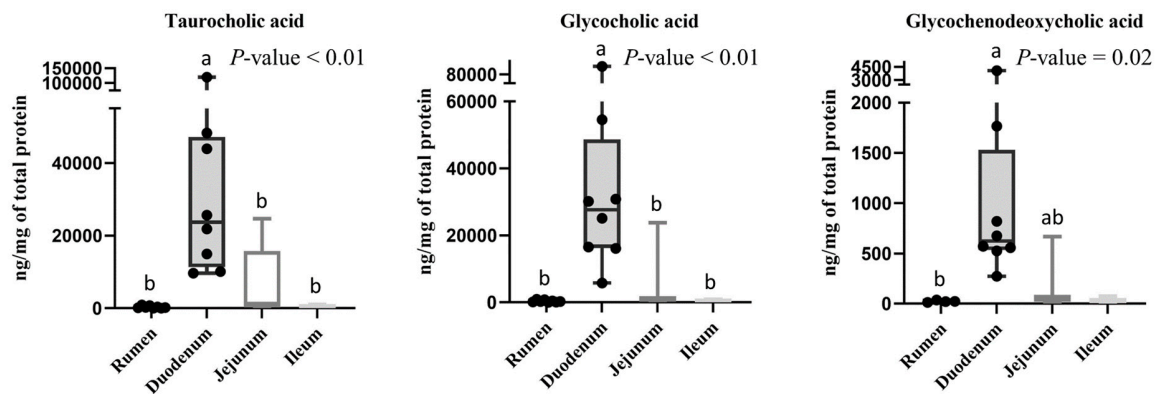

Supplement: s1 [file s1]
